# Supplementary material for: Retracted Article: CircRNA PVT1 modulates cell metastasis via the miR-181a-5p/NEK7 axis and cisplatin chemoresistance through miR-181a-5p-mediated autophagy in non-small cell lung cancer
Source: Royal Society of Chemistry journal article supplement (doi:10.1039/c9ra08872e), 2019-01-01

## F1-F

### A

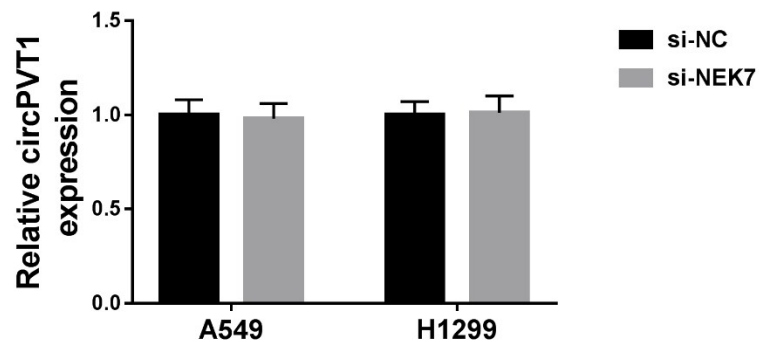

### B

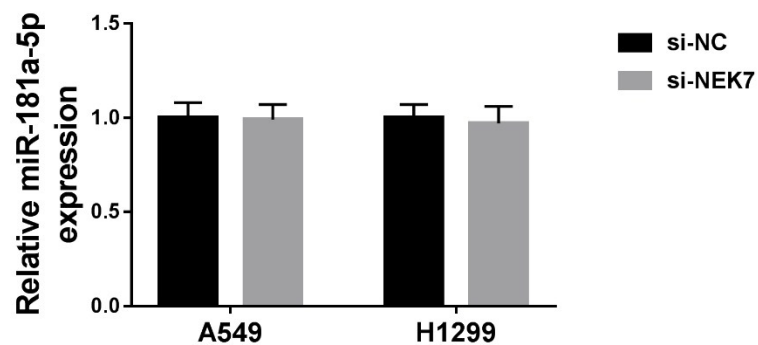

**Supplemented figure 1. The circPVT1 and miR-181a-5p levels were unchanged by NEK7 knockdown. (A and B).** The expression levels of circPVT1 and miR-181a-5p were determined in A549 and H1299 cells transfected with si-NEK7 or si-NC. \* $P < 0.05$ .

F1-F

NEK7 1

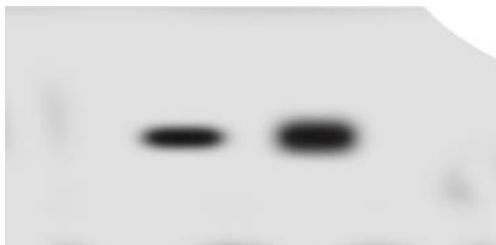

NEK7 2

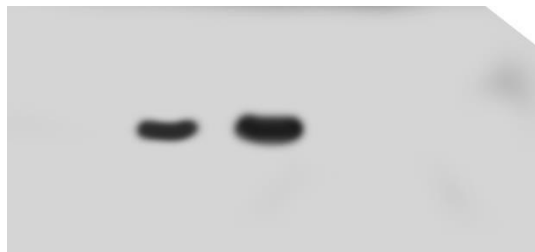

NEK7 3

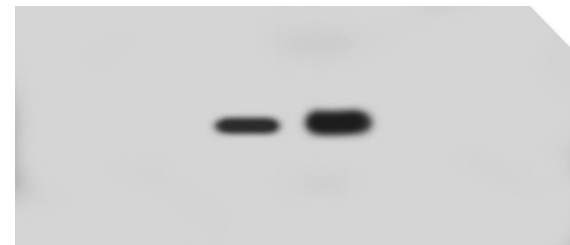

F1-F

$\beta$ -Actin 1

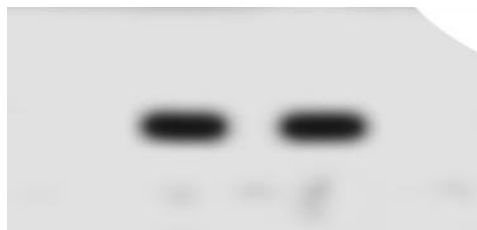

$\beta$ -Actin 2

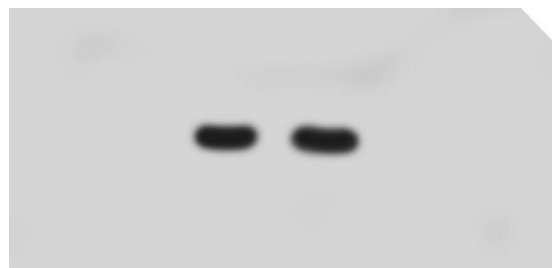

$\beta$ -Actin 3

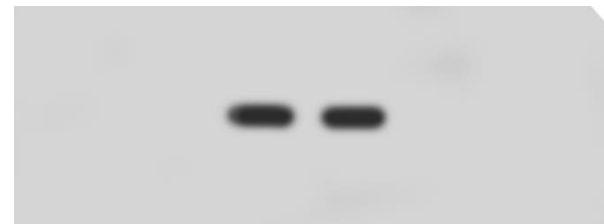

F1-H

NEK7 1

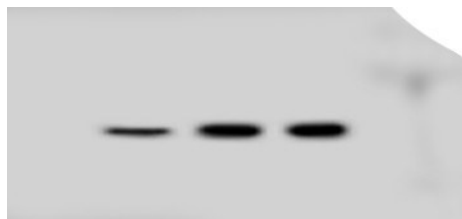

NEK7 2

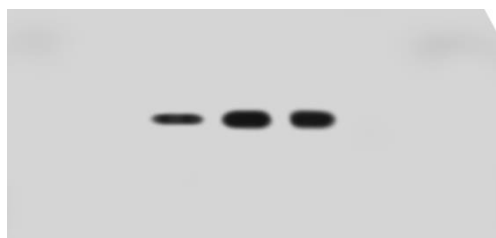

NEK7 3

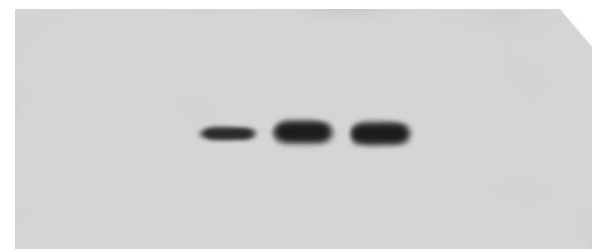

F1-H

$\beta$ -Actin 1

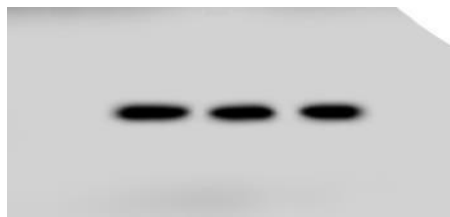

$\beta$ -Actin 2

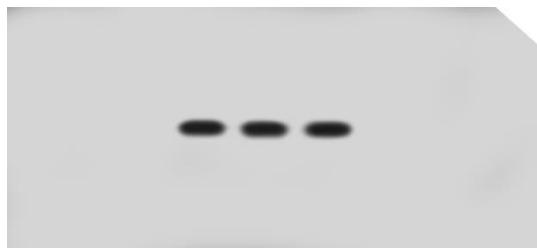

$\beta$ -Actin 3

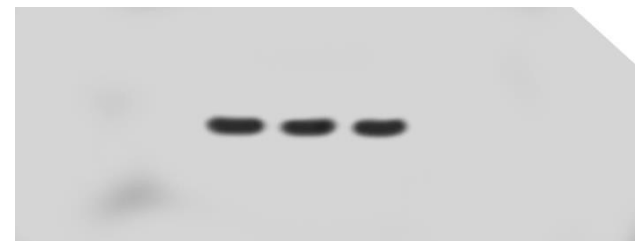

F2-E A549

Bax 1

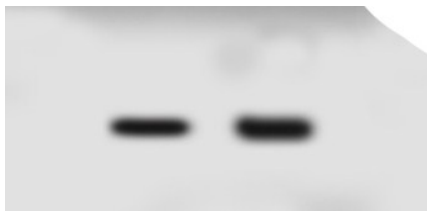

Bax 2

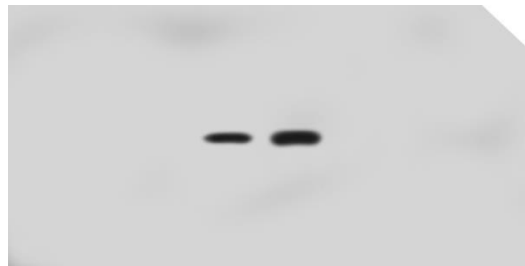

Bax 3

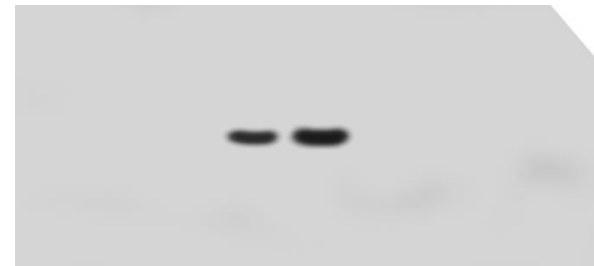

F2-E A549

Bcl-2 1

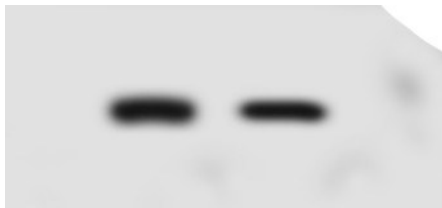

Bcl-2 2

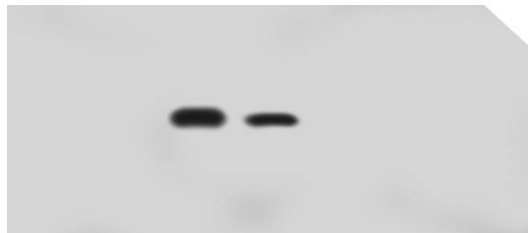

Bcl-2 3

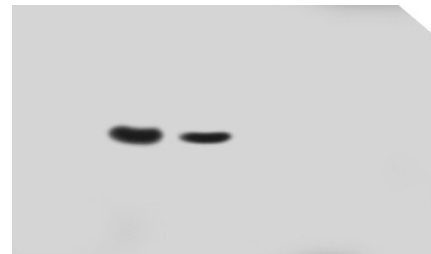

F2-E A549

$\beta$ -Actin 1

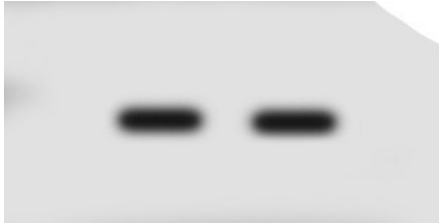

$\beta$ -Actin 2

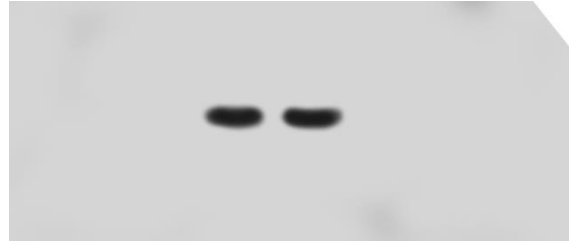

$\beta$ -Actin 3

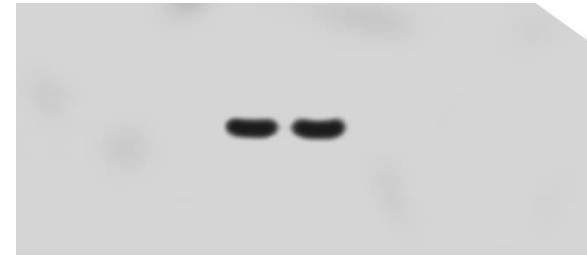



F2-E H1299

Bax 1

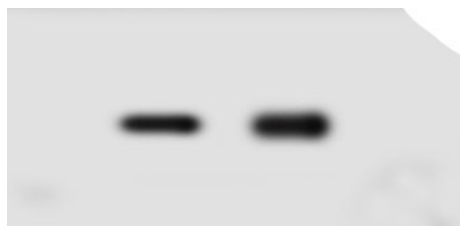

Bax 2

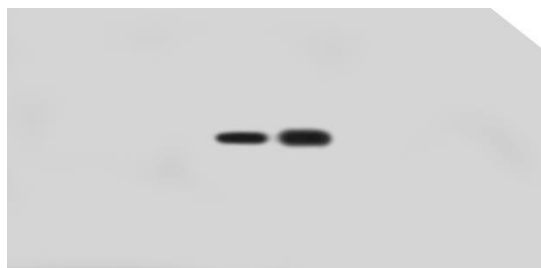

Bax 3

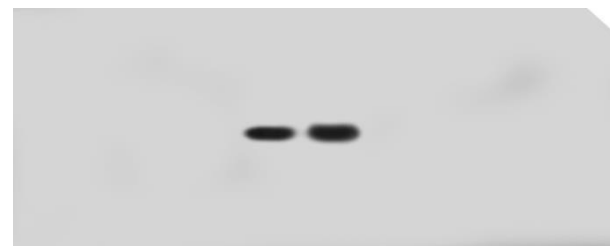

F2-E H1299

Bcl-2 1

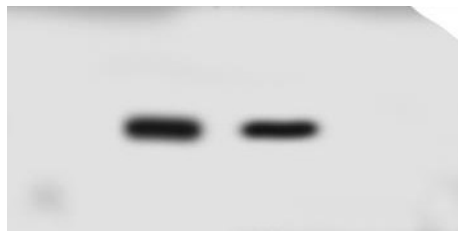

Bcl-2 2

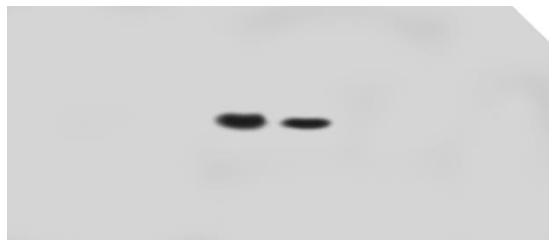

Bcl-2 3

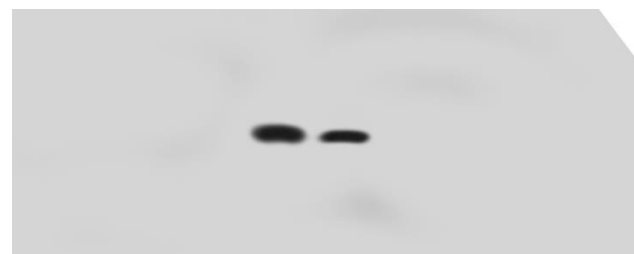

F2-E H1299

$\beta$ -Actin 1

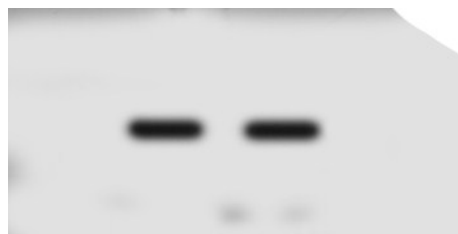

$\beta$ -Actin 2

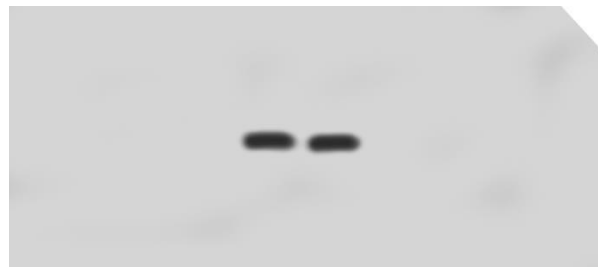

$\beta$ -Actin 3

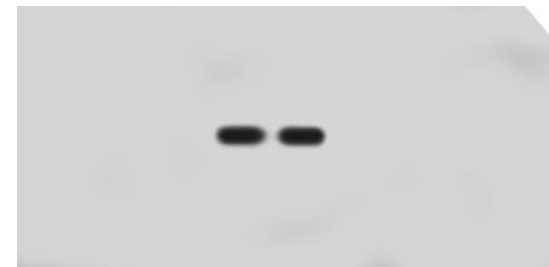

F2-G A549

E-cadherin 1

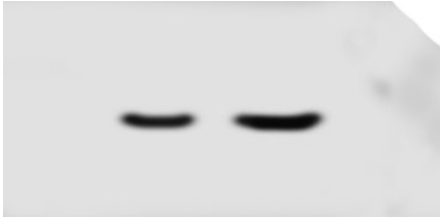

E-cadherin 2

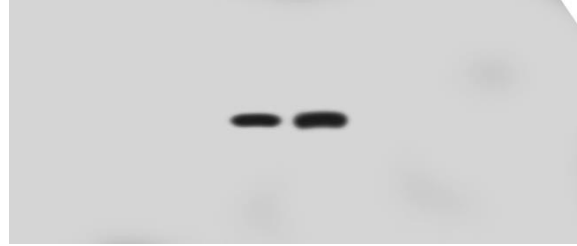

E-cadherin 3

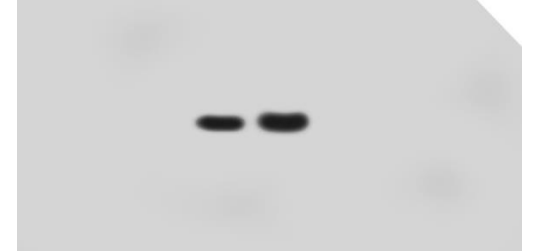

F2-G A549

Vimentin 1

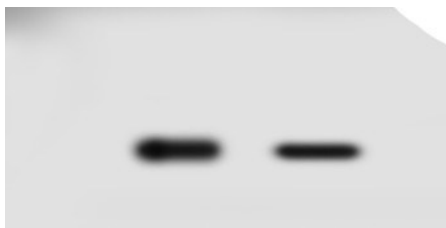

Vimentin 2

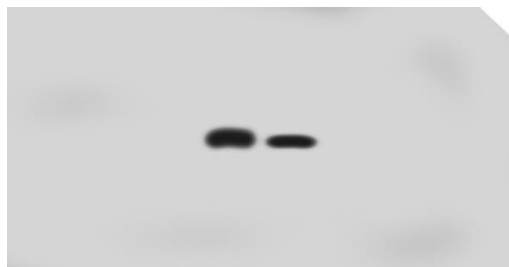

Vimentin 3

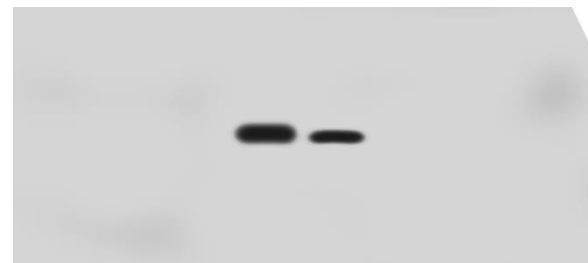

F2-G A549

N-cadherin 1

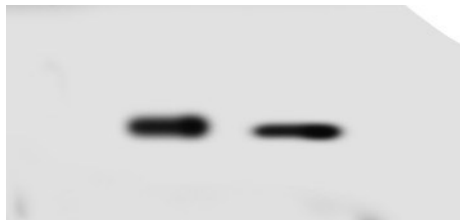

N-cadherin 2

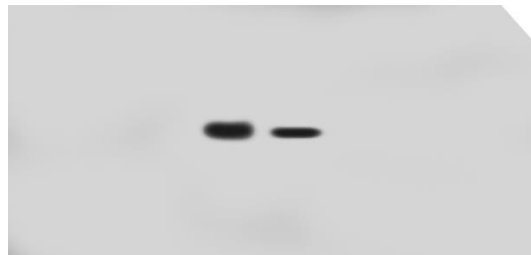

N-cadherin 3

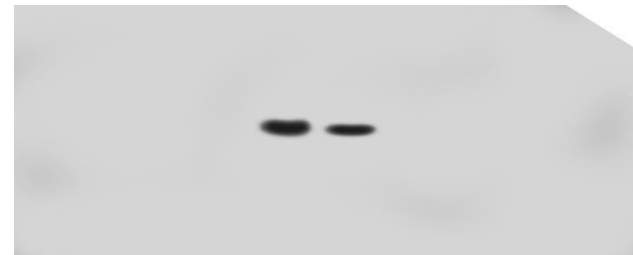

F2-G A549

$\beta$ -Actin 1

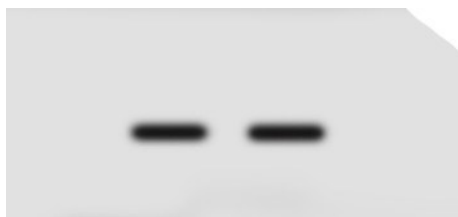

$\beta$ -Actin 2

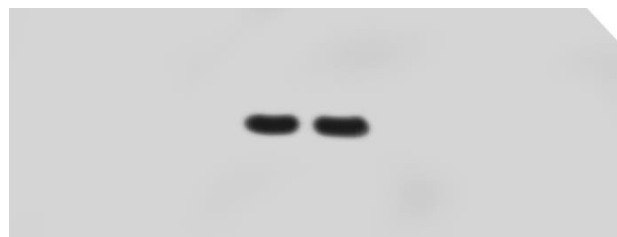

$\beta$ -Actin 3

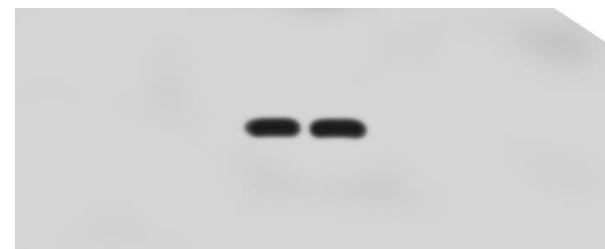

F2-G H1299

E-cadherin 1

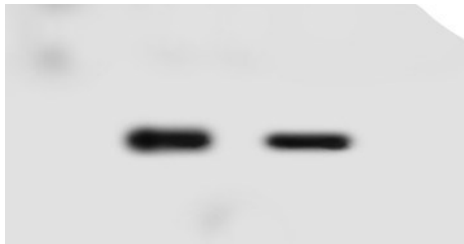

E-cadherin 2

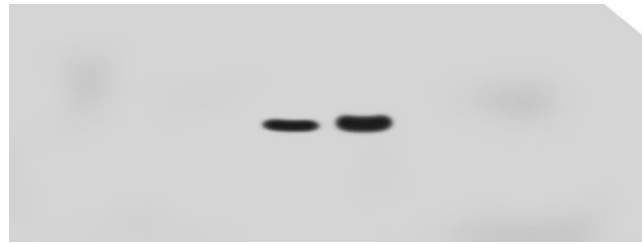

E-cadherin 3

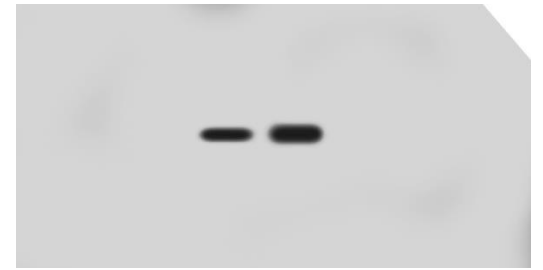



F2-G H1299

Vimentin 1

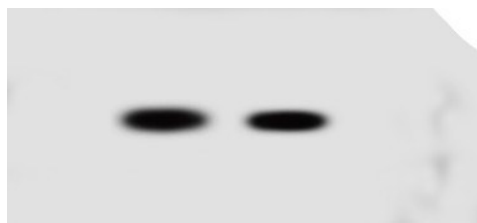

Vimentin 2

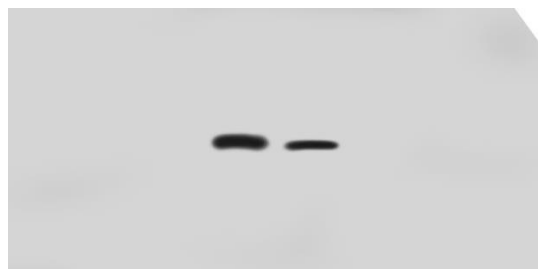

Vimentin 3

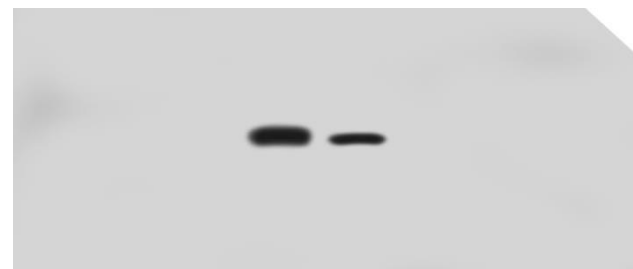

F2-G H1299

N-cadherin 1

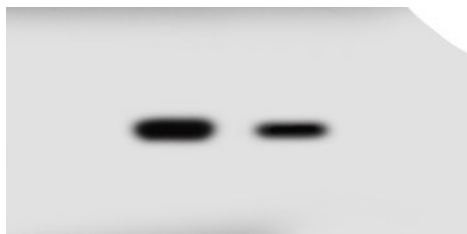

N-cadherin 2

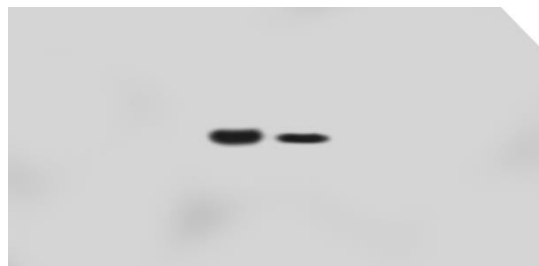

N-cadherin 3

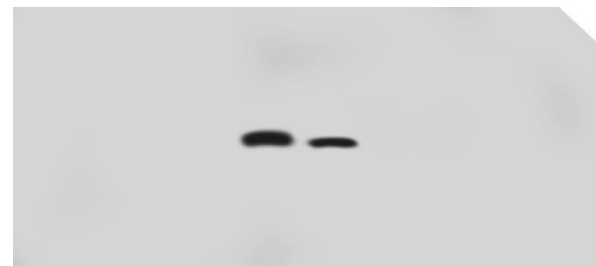

F2-G H1299

$\beta$ -Actin 1

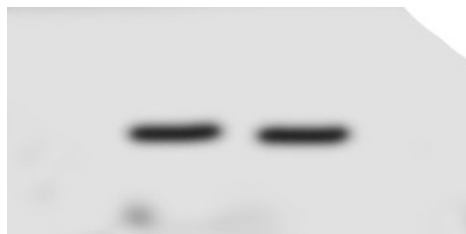

$\beta$ -Actin 2

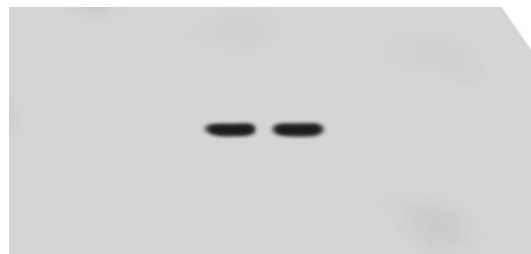

$\beta$ -Actin 3

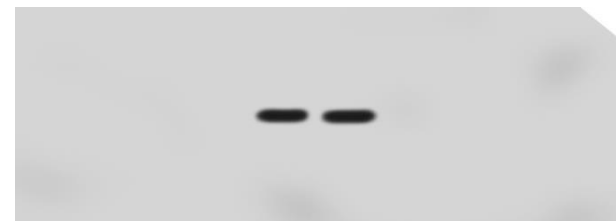

F4-E A549

F4-E 549 bax1

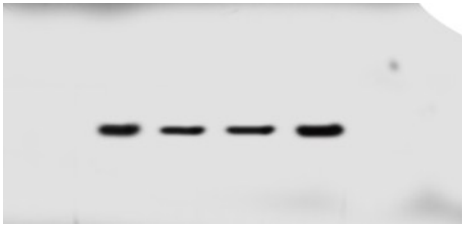

F4-E 549 bax2

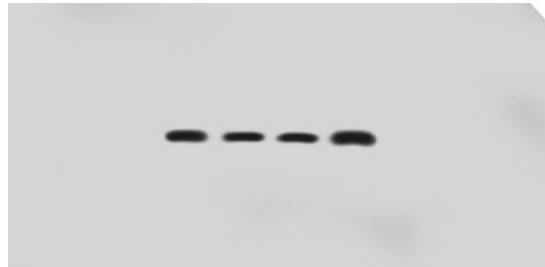

F4-E 549 bax3

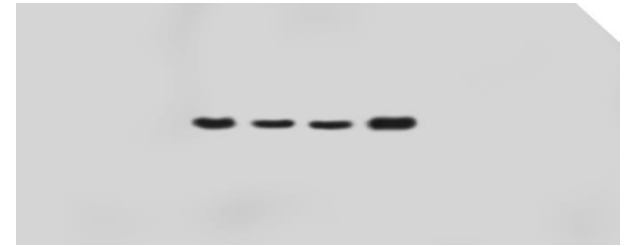

F4-E A549

Bcl-2 1

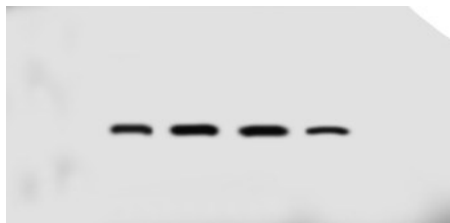

Bcl-2 2

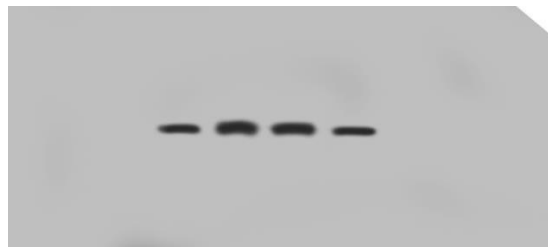

Bcl-2 3

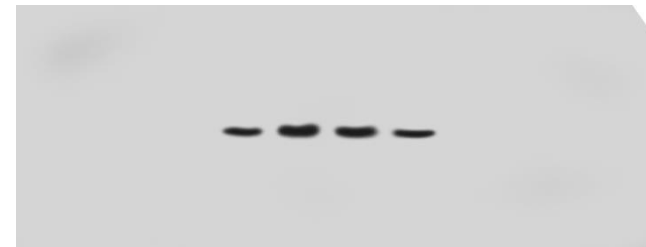

F4-E A549

$\beta$ -Actin 1

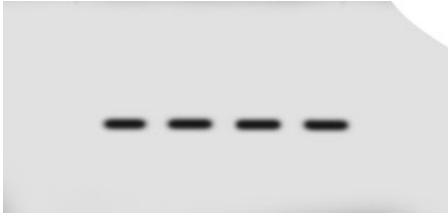

$\beta$ -Actin 2

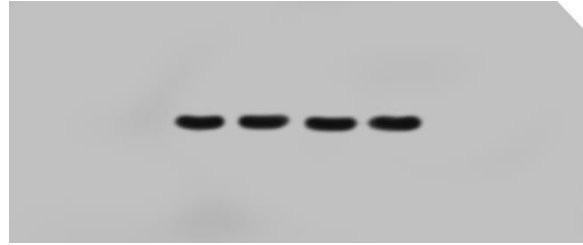

$\beta$ -Actin 3

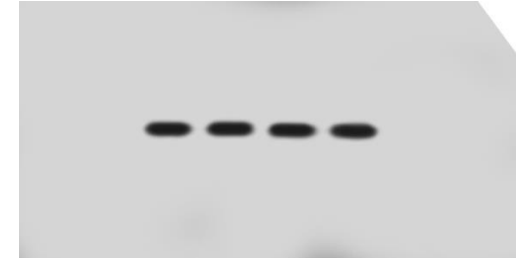

F4-E H1299

Bax 1

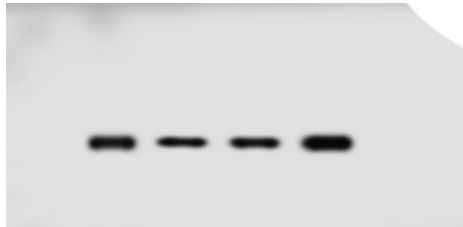

Bax 2

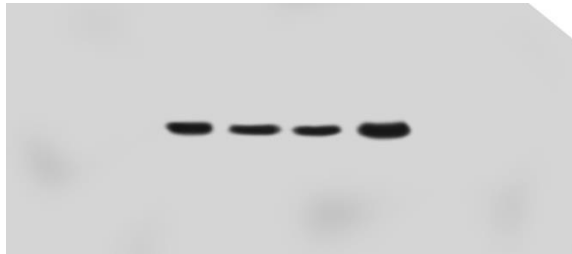

Bax 3

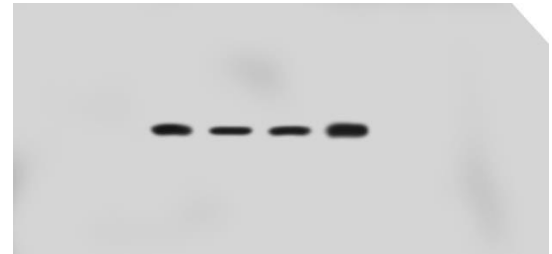

F4-E H1299

Bcl-2 1

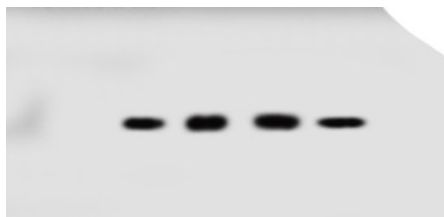

Bcl-2 2

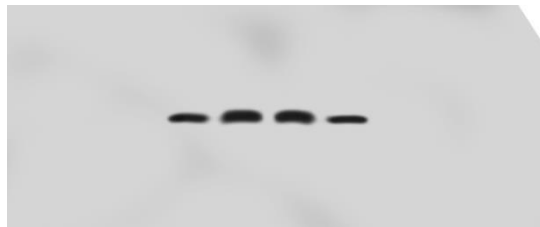

Bcl-2 3

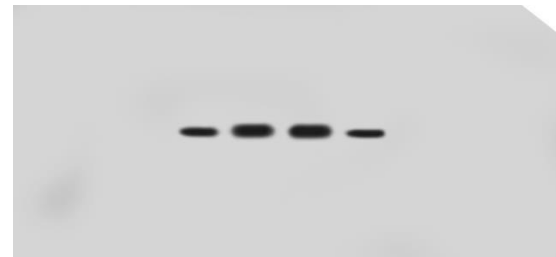



F4-E H1299

$\beta$ -Actin 1

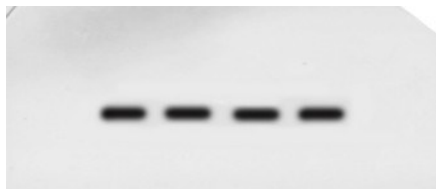

$\beta$ -Actin 2

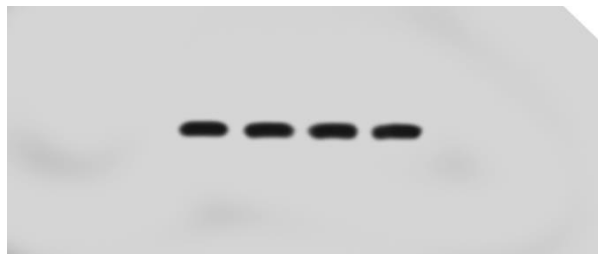

$\beta$ -Actin 3

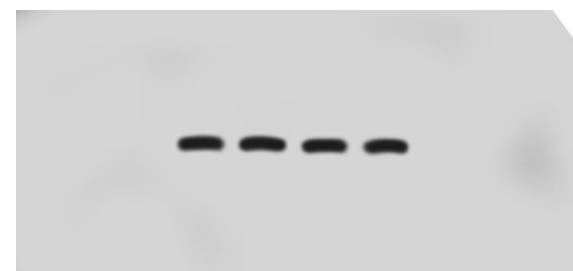

F4-G A549

E-cadherin 1

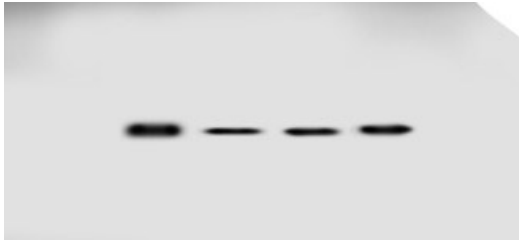

E-cadherin 2

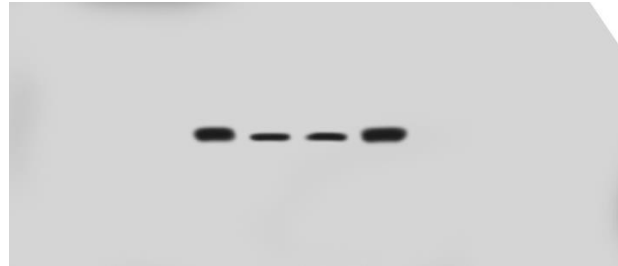

E-cadherin 3

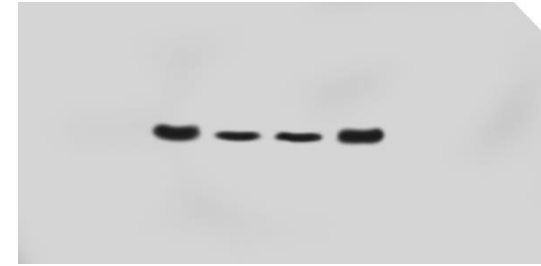

F4-G A549

Vimentin 1

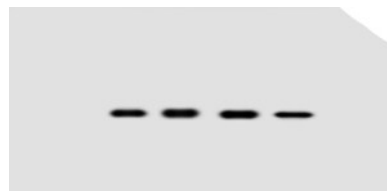

Vimentin 2

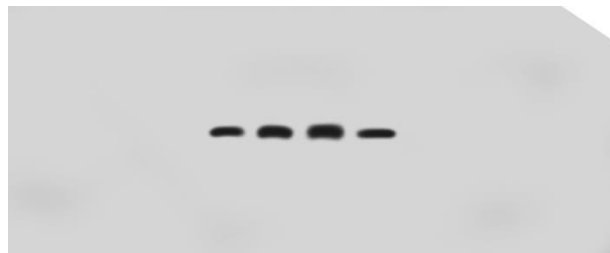

Vimentin 3

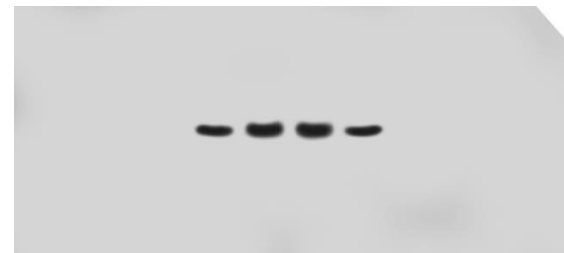

F4-G A549

N-cadherin 1

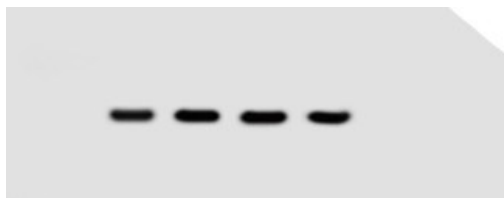

N-cadherin 2

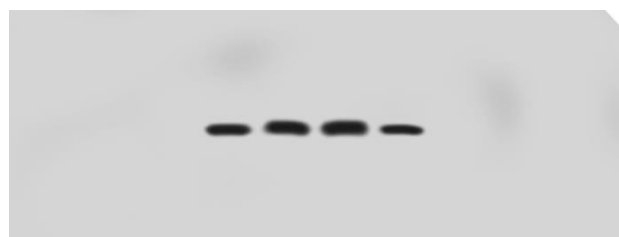

N-cadherin 3

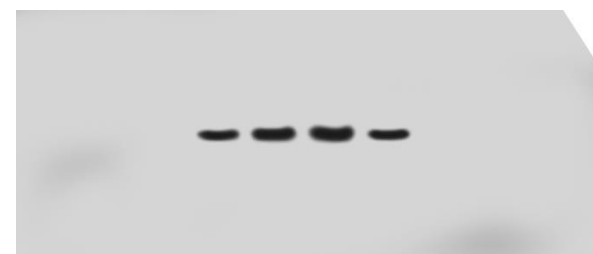

F4-G A549

$\beta$ -Actin 1

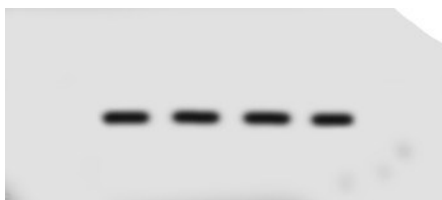

$\beta$ -Actin 2

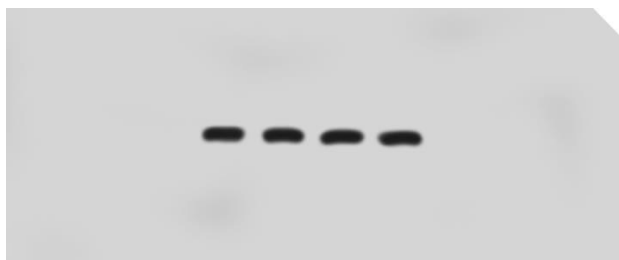

$\beta$ -Actin 3

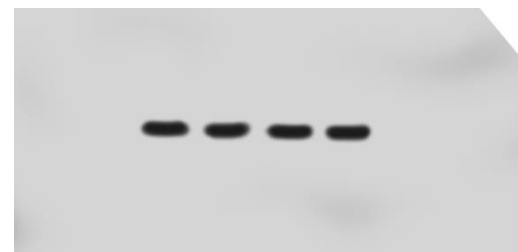

F4-H H1299

E-cadherin 1

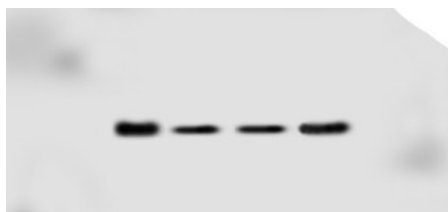

E-cadherin 2

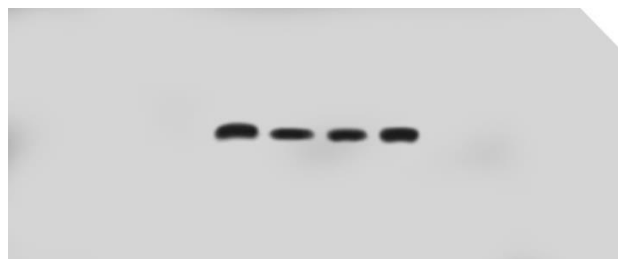

E-cadherin 3

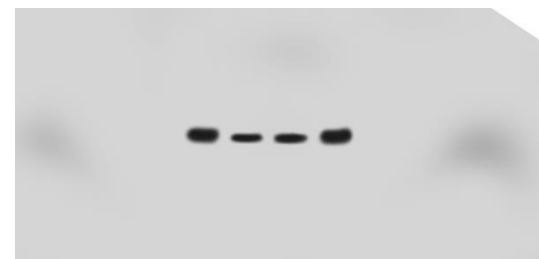

F4-H H1299

Vimentin 1

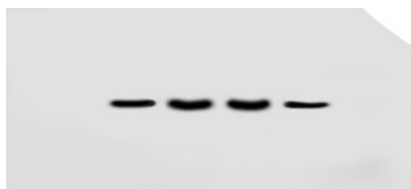

Vimentin 2

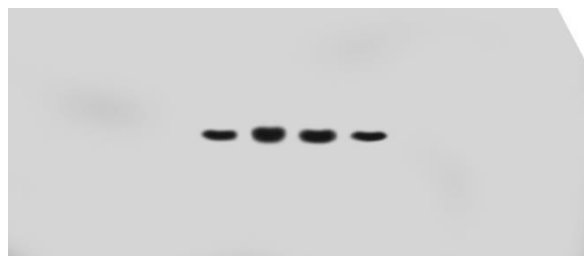

Vimentin 3

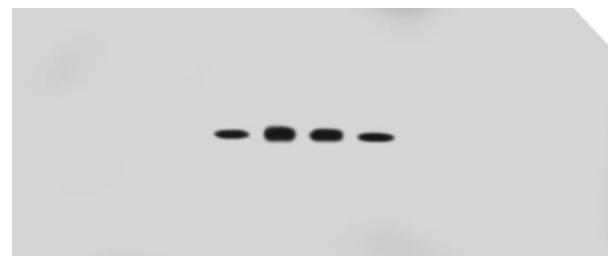

F4-H H1299

N-cadherin 1

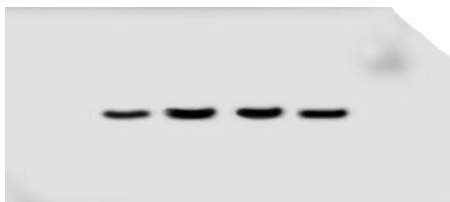

N-cadherin 2

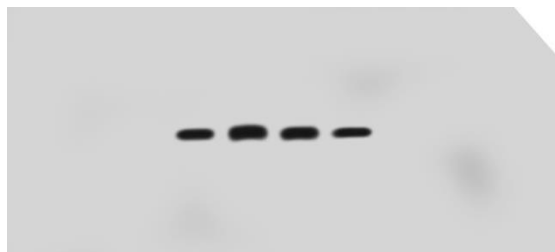

N-cadherin 3

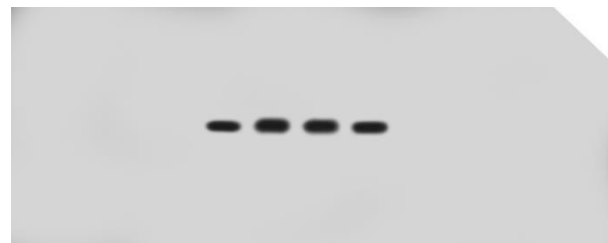



F4-H H1299

$\beta$ -Actin 1

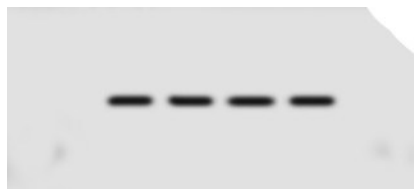

$\beta$ -Actin 2

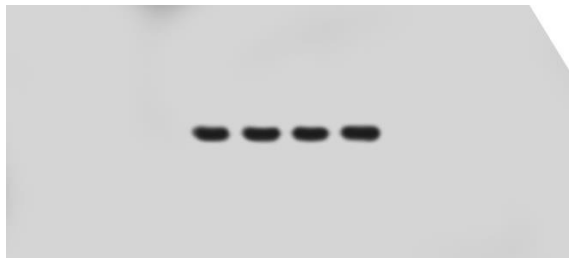

$\beta$ -Actin 3

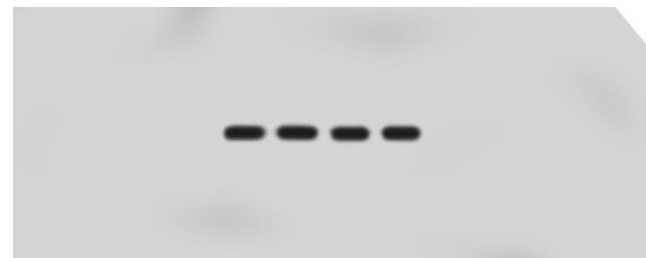

F5-E A549

$\beta$ -Actin 1

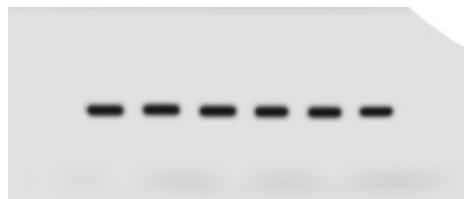

$\beta$ -Actin 2

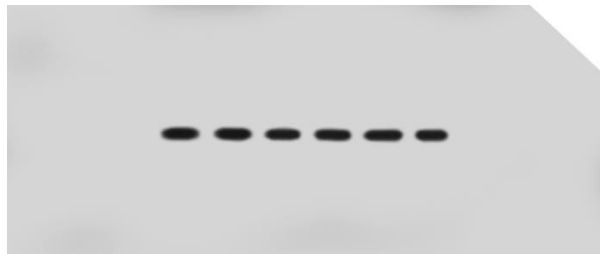

$\beta$ -Actin 3

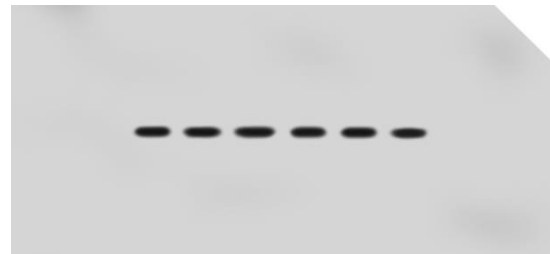

F5-E A549

NEK7 1

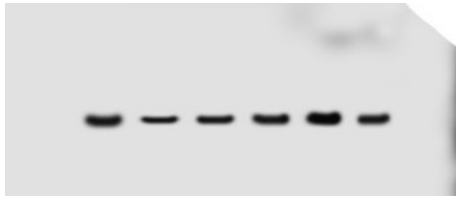

NEK7 2

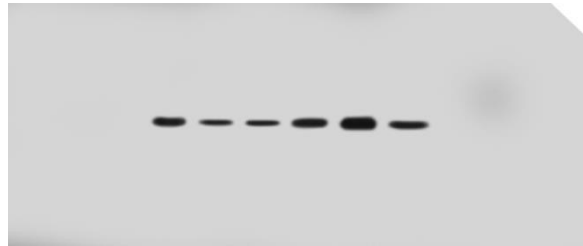

NEK7 3

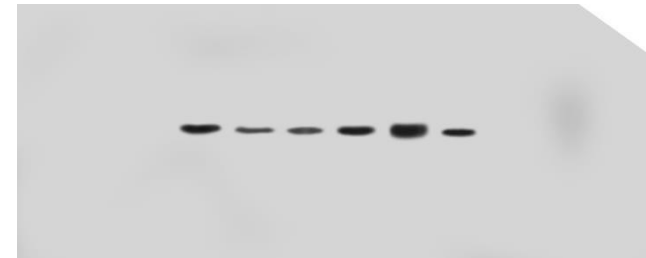

F5-E H1299

$\beta$ -Actin 1

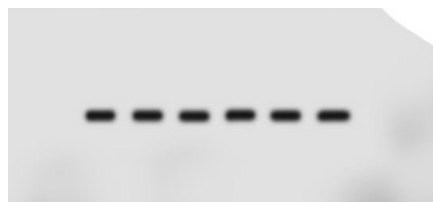

$\beta$ -Actin 2

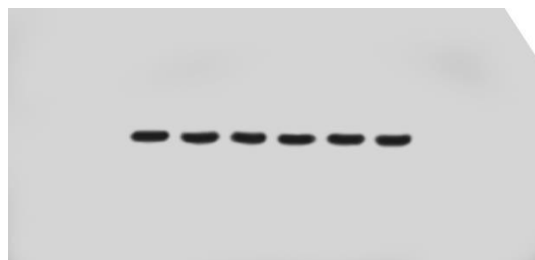

$\beta$ -Actin 3

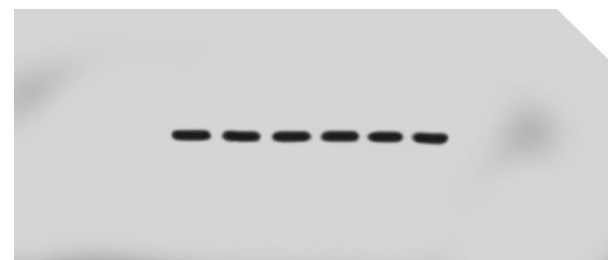

F5-E H1299

NEK7 1

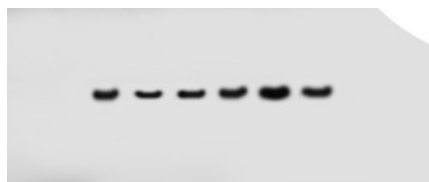

NEK7 2

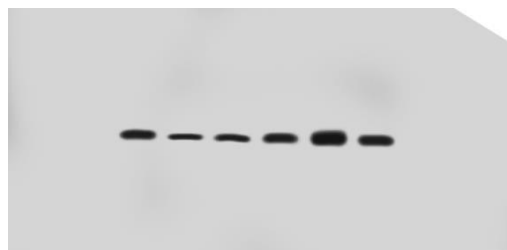

NEK7 3

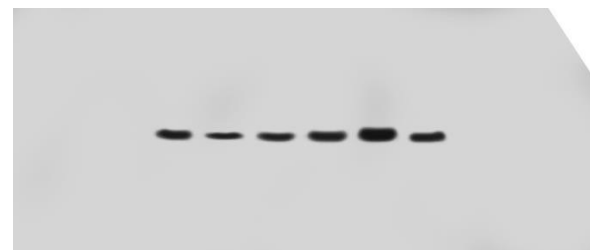

F5-G A549

E-cadherin 1

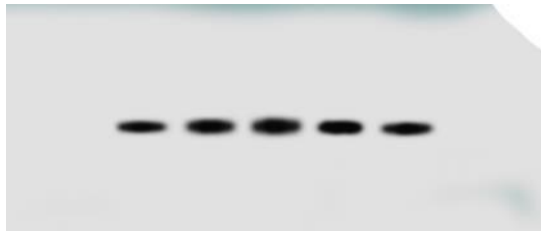

E-cadherin 2

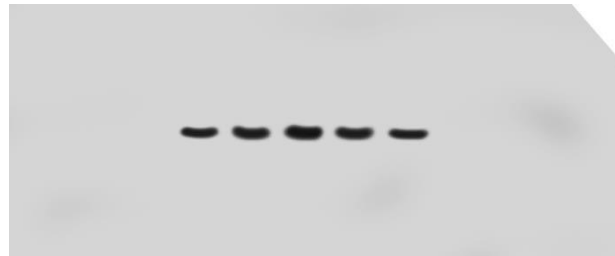

E-cadherin 3

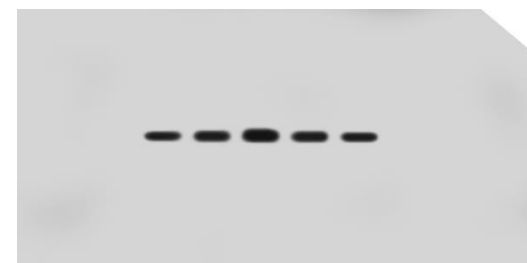

F5-G A549

Vimentin 1

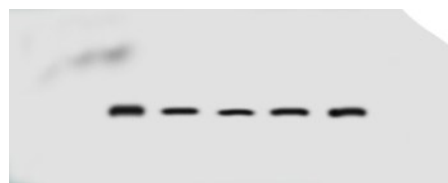

Vimentin 2

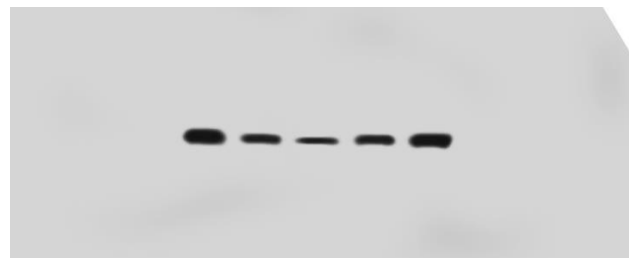

Vimentin 3

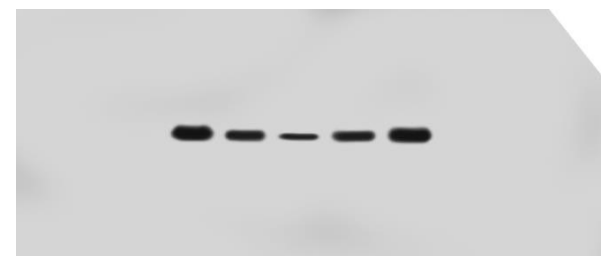

F5-G A549

N-cadherin 1

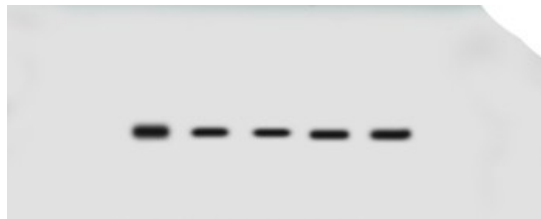

N-cadherin 2

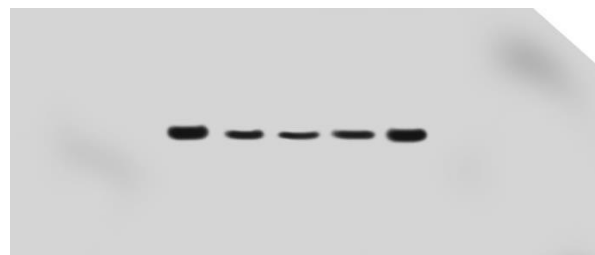

N-cadherin 3

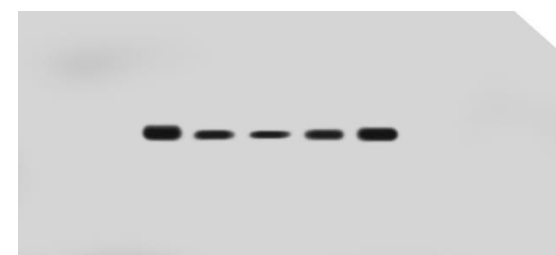



F5-G A549

$\beta$ -Actin 1

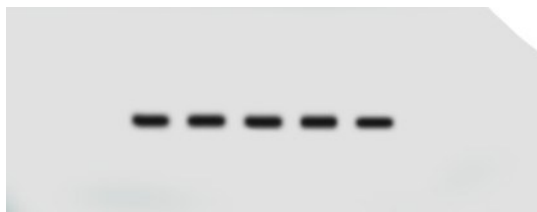

$\beta$ -Actin 2

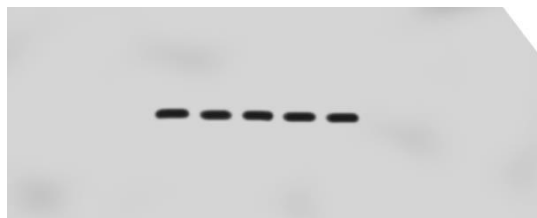

$\beta$ -Actin 3

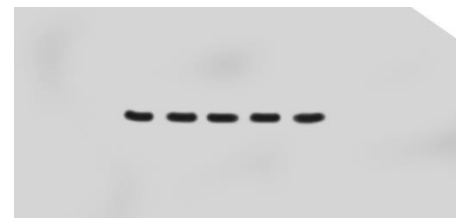

F5-H H1299

E-cadherin 1

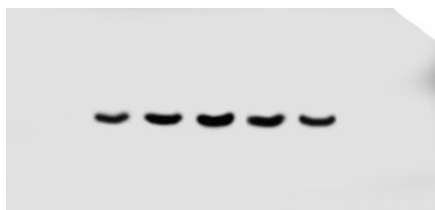

E-cadherin 2

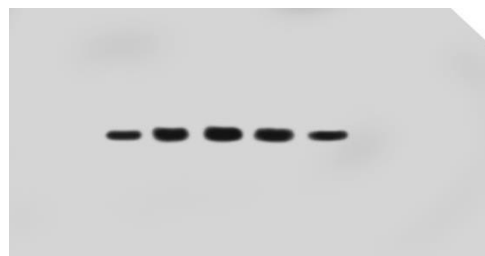

E-cadherin 3

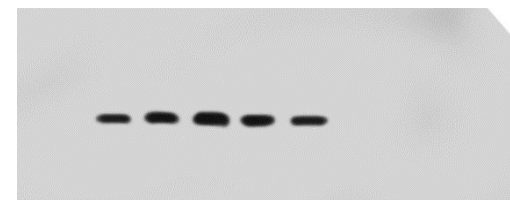

F5-H H1299

Vimentin 1

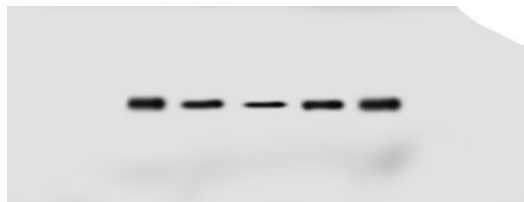

Vimentin 2

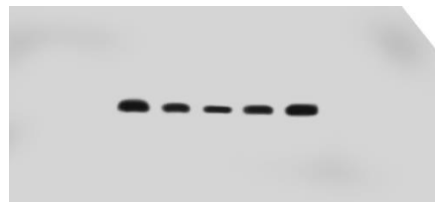

Vimentin 3

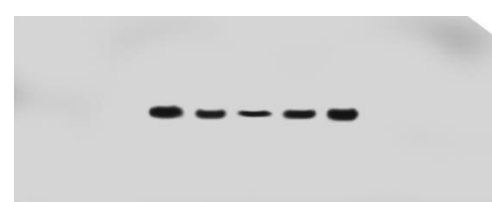

F5-H H1299

N-cadherin 1

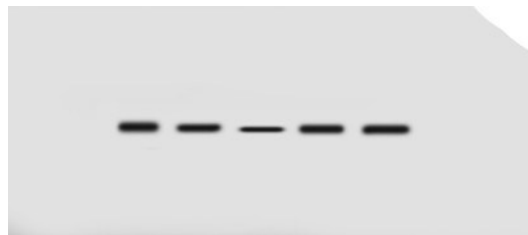

N-cadherin 2

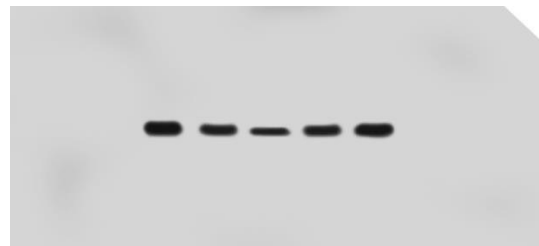

N-cadherin 3

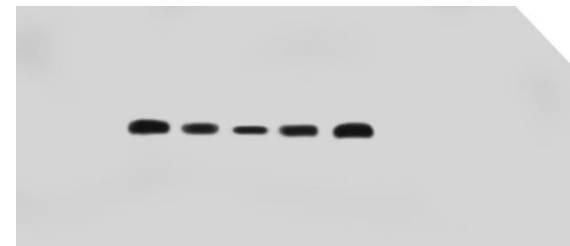

F5-H H1299

$\beta$ -Actin 1

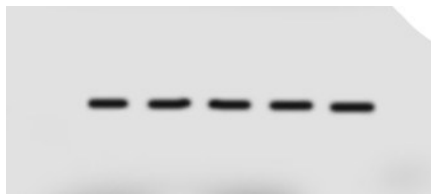

$\beta$ -Actin 2

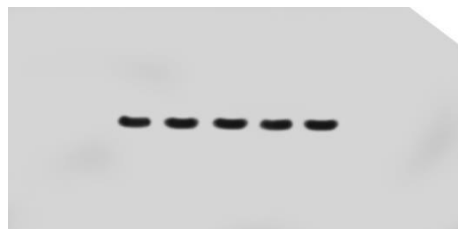

$\beta$ -Actin 3

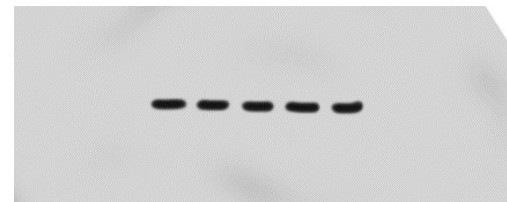

F6-B A549

Beclin-1 1

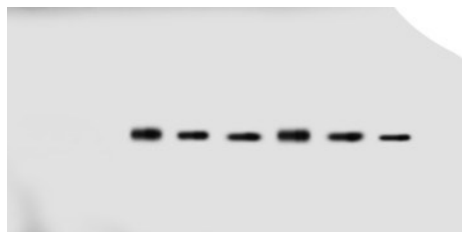

Beclin-1 2

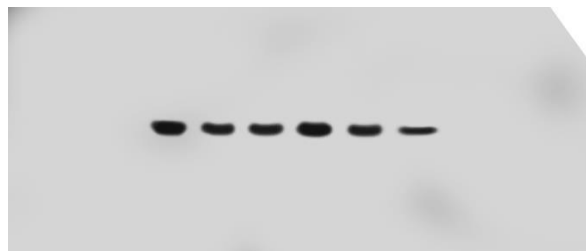

Beclin-1 3

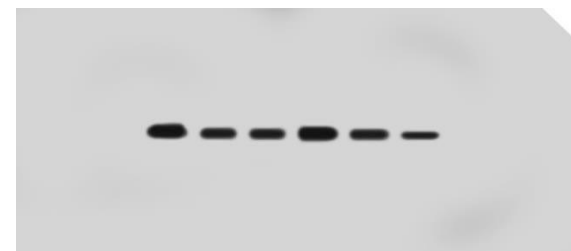

F6-B A549

p62 1

p62 2

p62 3

F6-B A549

$\beta$ -Actin 1

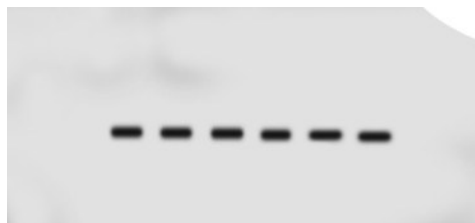

$\beta$ -Actin 2

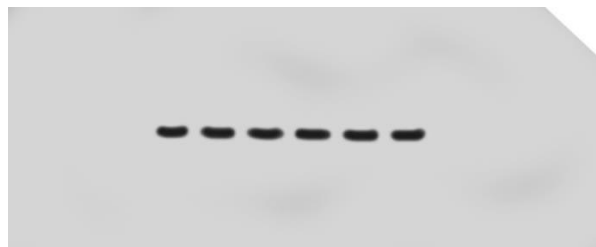

$\beta$ -Actin 3

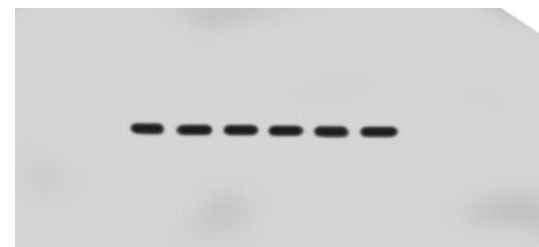



F6-B H1299

Beclin-1 1

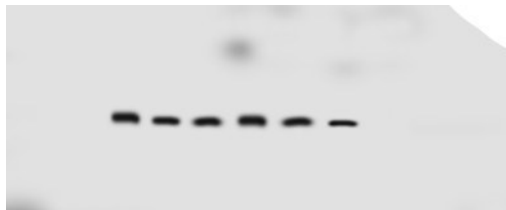

Beclin-1 2

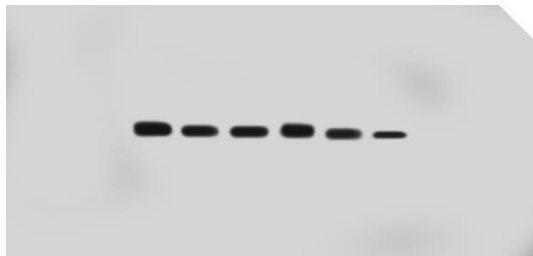

Beclin-1 3

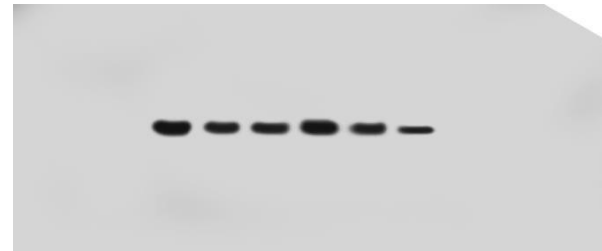

F6-B H1299

p62 1

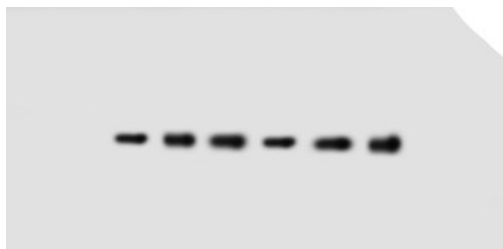

p62 2

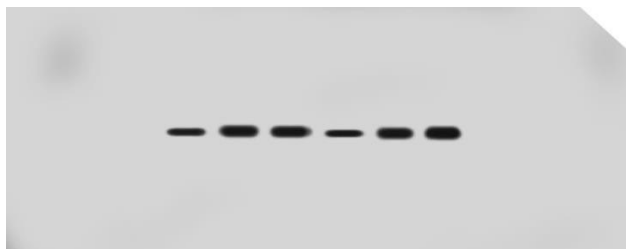

p62 3

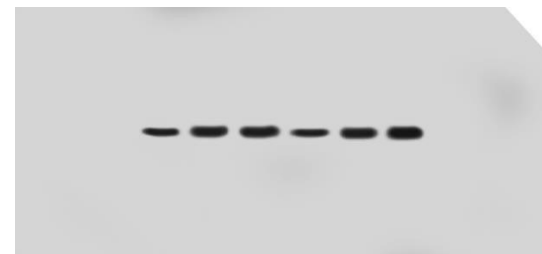

F6-B H1299

$\beta$ -Actin 1

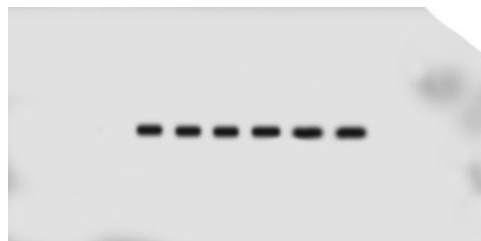

$\beta$ -Actin 2

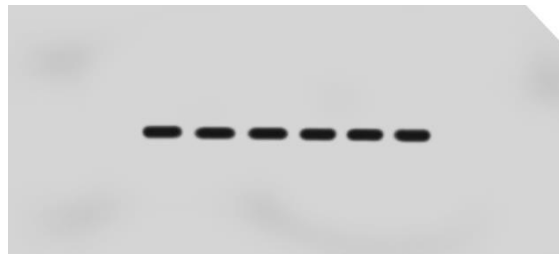

$\beta$ -Actin 3

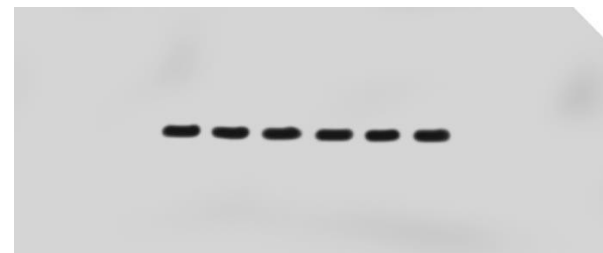

F6-F A549

Bcl-2 1

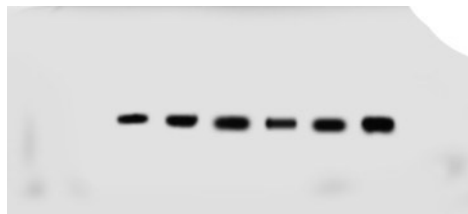

Bcl-2 2

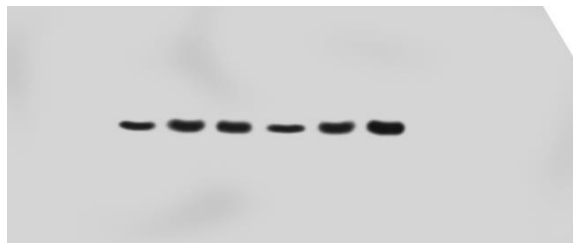

Bcl-2 3

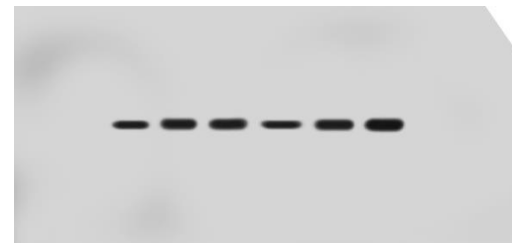

F6-F A549

Bax 1

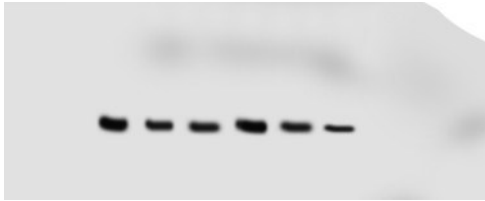

Bax 2

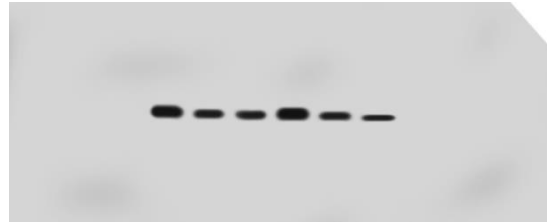

Bax 3

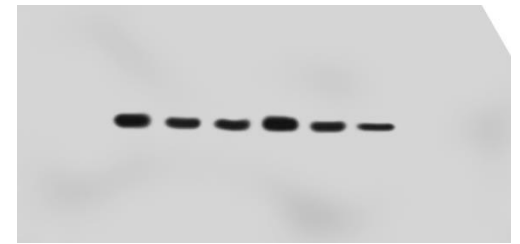

F6-F A549

$\beta$ -Actin 1

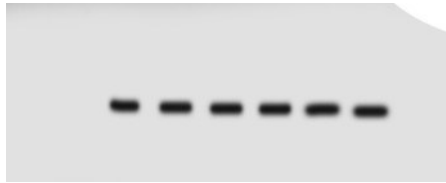

$\beta$ -Actin 2

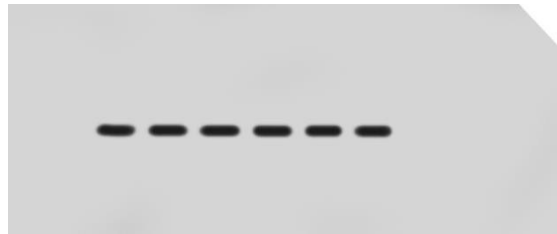

$\beta$ -Actin 3

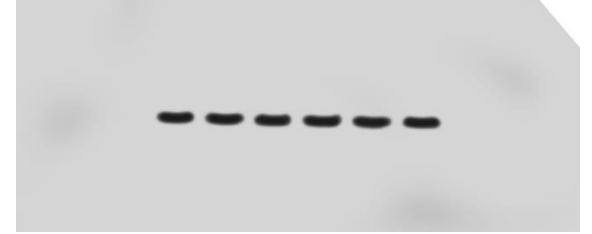

F6-F H1299

Bcl-2 1

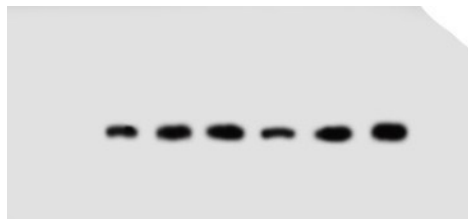

Bcl-2 2

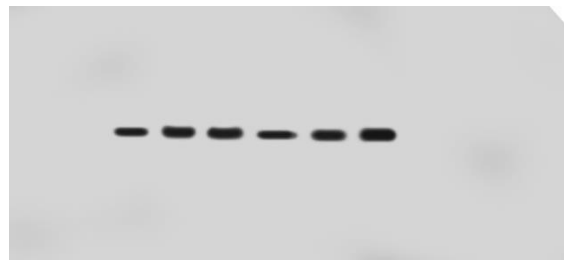

Bcl-2 3

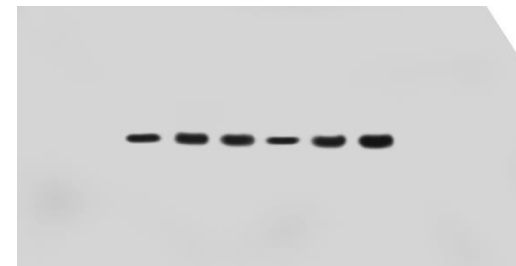

F6-F H1299

Bax 1

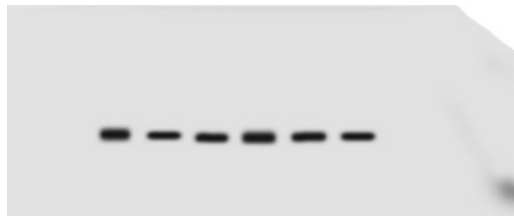

Bax 2

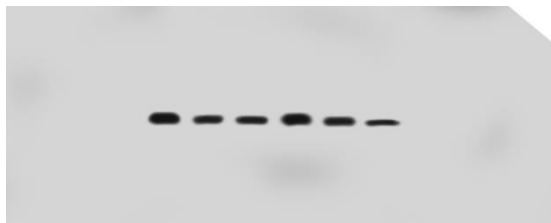

Bax 3

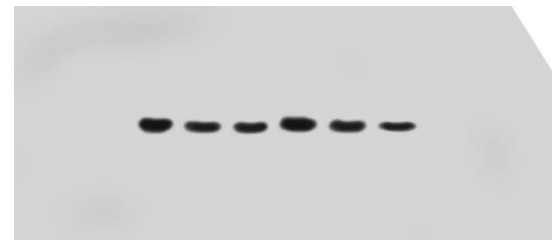



F6-F H1299

$\beta$ -Actin 1

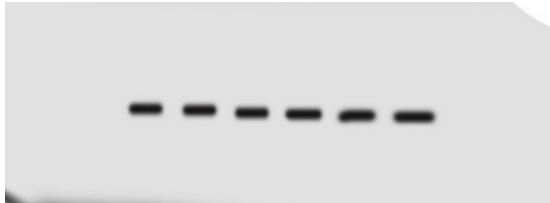

$\beta$ -Actin 2

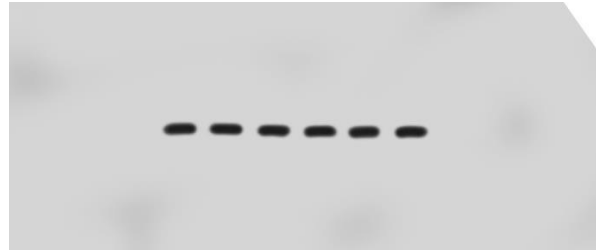

$\beta$ -Actin 3

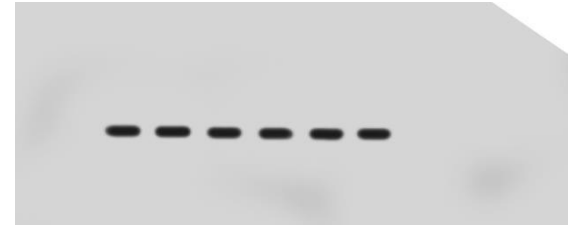

Supplement: c9ra08872e1.pdf [file c9ra08872e1.pdf]
